# Supplementary material for: Epidemiological characteristics of obstructive sleep apnea in a hospital-based historical cohort in Lebanon
Source: PubMed Central journal article supplement (PMC7228052; doi:10.1371/journal.pone.0231528), 2020-05-15
Supplement: pone.0231528.s001.pdf [file pone.0231528.s001.pdf]

1 **S1 File. Study Questionnaire – English Version**

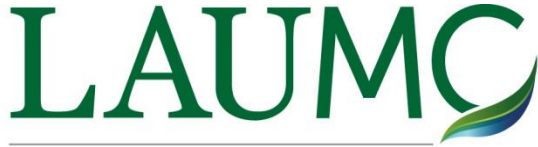

2 المركز الطبي للجامعة اللبنانية الأميركية - مستشفى رزق  
Lebanese American University Medical Center-Rizk Hospital

3

4

**SLEEP CLINIC**

5

**Dr. M-L COUSSA-KONISKI**

6

7

**GUIDELINES**

8

Please read the questions carefully and answer as they relate to a typical night or your typical sleep pattern. Please consult your bed partner for help in answering the questions, as they may know of problems that may occur during your sleep that you are not aware of.

9

10

11

12

Please note that:

13

-Frequently = happens almost every night/day.

14

-Occasionally = happens one or two times per week.

15

-Rarely = happens only once in a while.

16

Answer by circling your choice where appropriate: Do you snore?

17

Frequently      Occasionally      Rarely      Never

18

Otherwise write down your answer.

19

20

Name: \_\_\_\_\_ Phone Number: \_\_\_\_\_

21

Age: \_\_\_\_\_ Profession: \_\_\_\_\_

22

Sexe: F      M      Date: \_\_\_\_\_

23

1) Describe your sleep problem as best as you can:

24 \_\_\_\_\_

25 \_\_\_\_\_

26 \_\_\_\_\_

27 2) How long have you had this sleep problem? \_\_\_\_\_

28 3) Do you snore?

29            Frequently            Occasionally            Rarely            Never

30 4) How has your snoring been described?

31            Loud            Moderate            Mild

32 5) How has your snoring been described?

33            Continuous            Intermittent            Positional

34 6) Does your bed partner have to leave the room because of your snoring?

35                            Yes                            No

36 7) Do you wake up gasping, wheezing, or short of breath?

37            Frequently            Occasionally            Rarely            Never

38 8) Do you feel palpitations during the night?

39            Frequently            Occasionally            Rarely            Never

40 9) Do you get chest pain during the night?

41            Frequently            Occasionally            Rarely            Never

42 10) Do you toss and turn excessively in your sleep?

43            Frequently            Occasionally            Rarely            Never

44 11) Do your legs cramp or jerk upon retiring for sleep or during sleep?

45            Frequently            Occasionally            Rarely            Never

46 12) Do you wet your bed at night?

47            Frequently            Occasionally            Rarely            Never

48 13) Do you sleep walk?

49                                Frequently                                Occasionally                                Rarely                                Never

50                                14) What is the total duration (in hours) of sleep you get in a typical night's sleep?

51                                \_\_\_\_\_

52                                15) Do you feel rested after a typical night sleep?

53                                                Yes                                                No

54                                16) Are you confused and /or disoriented on awakening?

55                                                Frequently                                                Occasionally                                                Rarely                                                Never

56                                17) How long does it usually take for you to begin functioning normally when you awaken in the

57                                morning?

58                                                0-15 min                                                15-30 min                                                more than 30 min

59                                18) Do you wake up with an irritated or scratchy throat?

60                                                Frequently                                                Occasionally                                                Rarely                                                Never

61                                19) Do you wake up with morning headaches?

62                                                Frequently                                                Occasionally                                                Rarely                                                Never

63                                20) Do you sleep or get very sleepy whenever you are inactive during the day? (Such as at

64                                meetings, watching TV, at movies or in church):

65                                                Frequently                                                Occasionally                                                Rarely                                                Never

66                                21) Do you have daytime naps?

67                                                Frequently                                                Occasionally                                                Rarely                                                Never

68                                22) Do you have difficulty concentrating or memory problems?

69                                                Yes                                                No

70                                23) How many times have you been involved in automobile accidents, as a driver?

71                                \_\_\_\_\_

72                                24) Have you noticed a decrease in your sexual function or interest?

73                                                Yes                                                No

74                                25) Have you or any of your family/friends noticed any recent change in your personality?

75                   ☞ Aggressiveness                   Yes                   No  
 76                   ☞ Marked irritability                   Yes                   No  
 77                   ☞ Depression                   Yes                   No

78                   26) Do you ever experience muscle paralysis either upon going to sleep or awakening from  
 79                   sleep?

80                   Frequently                   Occasionally                   Rarely                   Never

81                   27) Do you lose muscle control or strength with emotions (anger, laugh, sadness)?

82                   Frequently                   Occasionally                   Rarely                   Never

83                   28) Do you experience vivid dreaming even though you know you are awake?

84                   Frequently                   Occasionally                   Rarely                   Never

85                   29) Does your job require shift work or travel?

86                   Yes                   No

87                   30) Do you have a history of?

88                   ☞ High blood pressure                   Yes                   No  
 89                   ☞ Diabetes                   Yes                   No  
 90                   ☞ Heart disease                   Yes                   No  
 91                   ☞ Breathing problems                   Yes                   No  
 92                   ☞ Recent weight gain                   Yes                   No

93                   31) Have you had any surgeries in the past?

94                   ☞ Tonsillectomy   Yes                   No  
 95                   ☞ Nose surgery                   Yes                   No  
 96                   ☞ Thyroid surgery                   Yes                   No

97                   ☞ Other \_\_\_\_\_

98                   32) How many alcoholic drinks do you take in a usual day?

99                   \_\_\_\_\_

100                   33) How many alcoholic drinks do you usually take before going to bed?

101                   \_\_\_\_\_

102                   34) What sleep medications?

103                   \_\_\_\_\_

104                   \_\_\_\_\_

105 \_\_\_\_\_

106 \_\_\_\_\_

107 35) Do you take antihistaminic? (For allergy, rhinitis.....)

108 Yes No

109 36) Do any of your family members have the same sleep problem as you?

110 Yes No
