# Supplementary material for: Epidemiological characteristics of obstructive sleep apnea in a hospital-based historical cohort in Lebanon
Source: PubMed Central journal article supplement (PMC7228052; doi:10.1371/journal.pone.0231528), 2020-05-15
Supplement: pone.0231528.s002.pdf [file pone.0231528.s002.pdf]

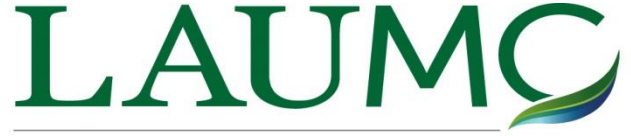

المركز الطبّي للجامعة اللبنانية الأميركية - مستشفى رزق  
Lebanese American University Medical Center-Rizk Hospital

2  
3

4

قسم امراض النعاس

5

الدكتورة ماري لويز كوسا كونسكي

6

7

ملاحظات

8

الرجاء قراءة الأسئلة بدقة وإعطاء أجوبة تمثل ليلة نوم عادية بالنسبة لك.

9

استعين(ي) بزوجتك (بزوجك) للإجابة، فإن لديها (ه) معلومات عن طريقة نومك لا تستطيع أن تعرفها.

10

11

إنتبه

12

- كثير : يحصل تقريبا كل ليلة أو كل يوم

13

- أحيانا : يحصل مرة أو مرتين في الأسبوع

14

- نادرا : يحصل مرة من وقت موقت فقط

15

الرجاء الإجابة بوضع علامة X في المربع المناسب:

16

كثيرا  أحيانا  نادرا  أبدا

17

أو بكتابة جوابك

18

19

الاسم و الشهرة: \_\_\_\_\_ الجنس:  ذكر  انثى

20

تاريخ الولادة: \_\_\_\_\_ الوزن: \_\_\_\_\_ الطول: \_\_\_\_\_

21

رقم الهاتف: \_\_\_\_\_ المهنة: \_\_\_\_\_

22 قياس العنق: التاريخ: \_\_\_\_\_/\_\_\_\_\_/\_\_\_\_\_

23 (1) صف مشكلة النوم التي تعاني بأدق ما يمكن:

24

---

25 (2) منذ متى تشكو من هذه المشكلة ؟

26

27 (3) هل تعاني من الشخير ؟

28  كثيرا  أحيانا  نادرا  أبدا

29 (4) كيف هو الشخير ؟

30  قوي  متوسط  خفيف

31 (5) هل شخيرك ؟

32  متواصل  متقطع  حسب طريقة نومك

33 (6) هل يضطر شريكك الى النوم في غرفة أخرى بسبب الشخير ؟

34  نعم  لا

35 (7) هل تستيقظ وانت تكاد تختنق، مقطوع النفس أو مع صفير في النفس ؟

36  كثيرا  أحيانا  نادرا  أبدا

37 (8) هل تشعر بدقة قلب سريعة في الليل ؟

38  كثيرا  أحيانا  نادرا  أبدا

39 (9) هل تشعر بألم في صدرك أثناء الليل ؟

40  كثيرا  أحيانا  نادرا  أبدا

41 (10) هل تحرك رجليك وأنت نائم ؟

42  كثيرا  أحيانا  نادرا  أبدا

43 (11) هل تشعر بتشنج في رجليك عندما تستيقظ ؟

44  كثيرا  أحيانا  نادرا  أبدا

45 (12) هل تبول في فراشك دون أن تدري في الليل ؟

46  كثيرا  أحيانا  نادرا  أبدا

47 (13) هل تروبص ؟

48  كثيرا  أحيانا  نادرا  أبدا

49 (14) كم ساعة تنام في الليل إجمالاً ؟

50 من \_\_\_\_\_ ساعات الى \_\_\_\_\_ ساعات

- 51 هل تكون مرتاحا عندما تستيقظ صباحا ؟ (15  
52 نعم  كلا
- 53 هل تشعر بأنك مبهم أو مرتبك عندما تستيقظ ؟ (16  
54 كثيرا  أحيانا  نادرا  أبدا
- 55 هل تشعر بألم أو بشحرقه في حنجرتك عندما تستيقظ ؟ (17  
56 كثيرا  أحيانا  نادرا  أبدا
- 57 هل تشعر بصداع في رأسك عندما تستيقظ ؟ (18  
58 كثيرا  أحيانا  نادرا  أبدا
- 59 هل تشعر بالنعاس عندما تكون جالسا في النهار ؟ (أثناء اجتماع، أمام التلفزيون، في السينما  
60 أو في الكنيسة)  
61 كثيرا  أحيانا  نادرا  أبدا
- 62 هل تشعر بجاجة للنوم في النهار ؟ (20  
63 نعم  كلا
- 64 هل تشعر بضعف في ذاكرتك أو في قدرتك على التفكير أو التركيز ؟ (21  
65 نعم  كلا
- 66 كم مرّة حصل لك حادث سيارة وأنت السائق ؟ (22  
67
- 
- 68 هل تشعر بندهور في نشاطك الجنسي ؟ (23  
69 نعم  كلا
- 70 هل لاحظت (أو احد أصدقائك لاحظ) تغيير جديد في شخصيتك ؟ (24  
71 -- سريع الغضب :  نعم  كلا
- 72 -- منهار الأعصاب :  نعم  كلا
- 73 هل تشعر بانثلال عضلاتك عندما تباشر النوم أو عندما تستيقظ ؟ (25  
74 كثيرا  أحيانا  نادرا  أبدا
- 75 هل تحلم وأنت مستيقظ ؟ (26  
76 كثيرا  أحيانا  نادرا  أبدا
- 77 هل بموجب عملك : تعمل ليلا ؟ أو تسافر كثيرا ؟ (27  
78 نعم  كلا
- 79 هل تعاني من : (28

- 80 -الضغط  نعم  كلا
- 81 -السكري  نعم  كلا
- 82 -مرض القلب  نعم  كلا
- 83 -مشاكل في التنفس  نعم  كلا
- 84 -زيادة جديدة في الوزن  نعم  كلا
- 85 هل خضعت لجراحة في الماضي؟ (29)

- 86 جراحة اللوزتين  نعم  كلا
- 87 جراحة الأنف  نعم  كلا
- 88 جراحة الغدة (التيروبيد)  نعم  كلا

89 غيرها: \_\_\_\_\_  
90 هل تشرب كحولا؟ (30)

91  نعم  كلا ← عدد الكؤوس: \_\_\_\_\_

92 هل تشرب كحولا قبل النوم؟ (31)

93  نعم  كلا

94 هل تستعمل دواء منوما أو دواء للأعصاب؟ (32)

95  نعم  كلا ← دُون أسماءهم: \_\_\_\_\_

96 \_\_\_\_\_

97 هل تستعمل دواء للحساسية أو الرشح؟ (33)

98  نعم  كلا ← دُون أسماءهم: \_\_\_\_\_

99 هل أحد في عائلتك يشكو من نفس المشكلة أثناء النوم؟ (34)

100  نعم  كلا
