# Supplementary material for: Epidemiological characteristics of obstructive sleep apnea in a hospital-based historical cohort in Lebanon
Source: PubMed Central journal article supplement (PMC7228052; doi:10.1371/journal.pone.0231528), 2020-05-15
Supplement: pone.0231528.s003.pdf [file pone.0231528.s003.pdf]

1 **S1 Table. Variables associated with hypertension: multiple logistic regression analysis**

| Variable      | Reference                                      | Univariate <i>p</i> | Multivariate <i>p</i> | Multivariate OR [95% CI]  |
|---------------|------------------------------------------------|---------------------|-----------------------|---------------------------|
| Age           | ≥70 years vs <70 years                         | <0.001              | 0.022                 | <b>1.71 [1.08 – 2.72]</b> |
| Sex           | Male vs female                                 | 0.402               | 0.556                 | 0.85 [0.48 – 1.48]        |
| BMI           | ≥30 kg/m <sup>2</sup> vs <30 kg/m <sup>2</sup> | <0.001              | 0.015                 | <b>1.71 [1.11 – 2.64]</b> |
| Snoring       | Present vs absent                              | 0.020               | 0.344                 | 1.27 [0.77 – 2.10]        |
| EDS           | Present vs absent                              | 0.011               | 0.691                 | 1.10 [0.70 – 1.72]        |
| Nocturia      | Present vs absent                              | 0.001               | 0.216                 | 1.40 [0.82 – 2.40]        |
| OSA           | Severe vs moderate/mild                        | <0.001              | 0.080                 | 0.69 [0.45 – 1.05]        |
| Dyslipidemia  | Present vs absent                              | <0.001              | 0.003                 | <b>1.87 [1.24 – 2.80]</b> |
| Diabetes      | Present vs absent                              | <0.001              | <0.001                | <b>4.59 [2.43 – 8.67]</b> |
| Arrhythmias   | Present vs absent                              | <0.001              | 0.255                 | 1.50 [0.75 – 3.00]        |
| CHD           | Present vs absent                              | 0.016               | 0.745                 | 1.19 [0.42 – 3.40]        |
| Dysthyroidism | Present vs absent                              | 0.016               | 0.592                 | 0.82 [0.40 – 1.68]        |
| MSK disorders | Present vs absent                              | 0.025               | 0.560                 | 0.79 [0.37 – 1.72]        |

2 BMI: body mass index; EDS: excessive daytime sleepiness; OSA: obstructive sleep apnea; MSK: musculoskeletal.
