# Supplementary material for: Epidemiological characteristics of obstructive sleep apnea in a hospital-based historical cohort in Lebanon
Source: PubMed Central journal article supplement (PMC7228052; doi:10.1371/journal.pone.0231528), 2020-05-15
Supplement: pone.0231528.s004.pdf [file pone.0231528.s004.pdf]

1 **S2 Table. Variables associated with diabetes: multiple logistic regression analysis**

| Variable      | Reference                                      | Univariate <i>p</i> | Multivariate <i>p</i> | Multivariate OR [95% CI]  |
|---------------|------------------------------------------------|---------------------|-----------------------|---------------------------|
| Age           | ≥70 years vs <70 years                         | <0.001              | 0.027                 | <b>1.85 [1.07 – 3.18]</b> |
| Sex           | Male vs female                                 | 0.001               | 0.239                 | 0.68 [0.36 – 1.29]        |
| BMI           | ≥30 kg/m <sup>2</sup> vs <30 kg/m <sup>2</sup> | <0.001              | 0.003                 | <b>2.67 [1.39 – 5.13]</b> |
| Nocturia      | Present vs absent                              | 0.013               | 0.589                 | 1.19 [0.63 – 2.27]        |
| OSA           | Severe vs moderate/mild                        | 0.010               | 0.447                 | 0.81 [0.47 – 1.40]        |
| Hypertension  | Present vs absent                              | <0.001              | <0.001                | <b>4.11 [2.17 – 7.78]</b> |
| Dyslipidemia  | Present vs absent                              | <0.001              | <0.001                | <b>5.15 [2.89 – 9.16]</b> |
| CHD           | Present vs absent                              | 0.001               | 0.312                 | 1.70 [0.61 – 4.78]        |
| Dysthyroidism | Present vs absent                              | <0.001              | 0.001                 | <b>3.60 [1.72 – 7.56]</b> |
| GERD          | Present vs absent                              | 0.038               | 0.151                 | 0.68 [0.40 – 1.15]        |

2 BMI: body mass index; CHD: coronary heart disease; OSA: obstructive sleep apnea; GERD: gastro-esophageal reflux  
 3 disorder.
